# Supplementary material for: FBXW7β isoform drives transcriptional activation of the proinflammatory TNF cluster in human pro-B cells
Source: PubMed Central journal article supplement — Blood Adv. 2022 Nov 5;7(7):1077–91. doi: 10.1182/bloodadvances.2022007910 (PMC10111352; doi:10.1182/bloodadvances.2022007910), 2022-11-05
Supplement: BLOODA_ADV-2022-007910-mmc1.pdf [file BLOODA_ADV-2022-007910-mmc1.pdf]

Supplemental Materials for

**FBXW7 $\beta$  isoform drives transcriptional activation of a proinflammatory TNF cluster in human pro-B cells**

Yang *et al.*

Contains Supplemental Methods, Supplemental Figures, and Supplemental Tables

## SUPPLEMENTAL METHODS

### Dataset usage

We accessed RNA-seq data from the St. Jude Cloud, an initiative of St. Jude Children's Research Hospital (<https://www.stjude.cloud>) and from the Cancer Cell Line Encyclopedia (CCLE) (<https://sites.broadinstitute.org/ccle>). St. Jude Cloud data used for this analysis (EGAD00001002704 and EGAD00001002692) were accessed by permission from the Computational Biology Committee through the European Bioinformatics Institute (EMBL-EBI).

### Spearman correlation

Correlations and their significance were computed using the nonparametric Spearman's rank-order correlation implemented in R function `cor.test()`.

### Cell culture

REH cells were maintained in RPMI-1640 medium supplemented with 10% FBS, 2 mmol/L L-glutamine, 25 mM HEPES, and antibiotic-antimycotic at 37°C and 5% CO<sub>2</sub>. 293T cells were cultured in DMEM with the same supplements.

### Cell lysis for immunoprecipitation (IP) and immunoblotting (IB)

Cells were centrifuged at 250 × g for 5 minutes. The cell pellet was lysed on ice in buffer containing 150mM NaCl, 50mM Tris pH 8.0, 1% Triton X-100, and 2 × Halt protease and phosphatase inhibitors (Thermo Fisher 78446, 100×). Protein concentration of lysates was maintained at 2 – 4 µg/µL. Cell debris was pelleted at 5000 × g for 5 minutes. Supernatant was collected for direct IB or IP before IB.

### In-solution digestion prior to mass spectrometry

Cell pellets were lysed solubilized and digested with the iST kit (PreOmics GmbH, Martinsried, Germany) per manufacturers protocol. Briefly, the resulting pellet was solubilized, reduced and alkylated by addition of SDC buffer containing TCEP and 2-chloroacetamide then heated to 95°C for 10 minutes. Proteins were enzymatically hydrolyzed for 1.5 hours at 37°C by addition of LysC and trypsin. The resulting peptides were de-salted, dried by vacuum centrifugation and reconstituted in 0.1% TFA containing iRT peptides (Biognosys Schlieren, Switzerland).

### Mass Spectrometry (MS) Analysis

Samples were analyzed on a QExactive HF mass spectrometer (Thermo Fisher Scientific San Jose, CA) coupled with an Ultimate 3000 nano UPLC system and EasySpray source. Peptides were separated by reverse phase (RP)-HPLC on Easy-Spray RSLC C18 2µm 75 µm id × 50 cm column at 50°C. Mobile phase A consisted of 0.1% formic acid and mobile phase B of 0.1% formic acid/acetonitrile. Peptides were eluted into the mass spectrometer at 300 nL/min with each RP-LC run comprising a 95-minute gradient from 1 to 3% B in 5 min, 3-45%B in 90 min. The mass spectrometer was set to repetitively scan m/z from 300 to 1400 (R = 120,000) followed by data-dependent MS/MS scans on the twenty most abundant ions, dynamic exclusion with a repeat count of 1, repeat duration of 30s, (R=15000) and a nce of 27. FTMS full scan AGC target value was 3e6, while MSn AGC was 2e5, respectively. MSn injection time was 32 ms; microscans were set at one. Rejection of unassigned, 1, 6-8 and >8 charge states was set.

### MS raw data processing

Peak lists obtained from MS/MS spectra were identified using a combination of three search engines (MSGF+, Comet, and X!Tandem). The search was conducted using SearchGUI. Protein

identification was conducted against a concatenated target/decoy version of the Homo sapiens complement of the UniProtKB. The decoy sequences were created by reversing the target sequences in SearchGUI. The identification settings were as follows: Trypsin, Specific, with a maximum of 2 missed cleavages, 10.0 ppm as MS1 and 0.02 Da as MS2 tolerances; fixed modifications: Carbamidomethylation of Cys, variable modifications: Oxidation of Met and Acetylation of protein N-term. Peptides and proteins were inferred from the spectrum identification results using PeptideShaker version 1.16.45. Peptide Spectrum Matches (PSMs), peptides and proteins were validated at a 1.0% False Discovery Rate (FDR) estimated using the decoy hit distribution.

### **Plasmids, transfections, viral vectors, and transductions**

#### **FBXW7 expression plasmids for transient overexpression:**

Each FBXW7 isoform ORF (without the stop codon) was cloned into a pcDNA3.1+ plasmid backbone (pcDNA3.1+/C-(K)-DYK vector) that contained the Kozak sequence N-terminal to the gene insert and a FLAG tag C-terminal to the gene insert by Genscript. The empty pcDNA3.1+ vector control used in the experiments did not contain a FLAG tag. These plasmids were used for transient overexpression in 293T cells via the Lipofectamine 3000 reagent (Thermo Fisher).

#### **Plasmids for CRISPR-Cas9 genome editing:**

LentiV\_Cas9\_puro (cc60) viral vector (gift from Junwei Shi) was used to transduce the REH cell line, yielding the polyclonal REHCas9 cells after puromycin selection.

Each of the CRISPR guide sequences was cloned into the Lenti\_gRNA-GFP(LRG)\_2.1T plasmid individually. The empty LRG\_2.1T plasmid was a gift from Junwei Shi. After cloning, the two CRISPR guide plasmids (in their DNA form) were electroporated into REHCas9 cells simultaneously with the Lonza AMAXA Nucleofector 2b device (device program O-013 and Nucleofector Solution V were used for REH). GFP+ electroporated cells were FACS-sorted into single cell clones at 48h post-transfection. Because the two guides targeted introns that flank the exon of interest, the transient expression of the two guides allowed removal of the specific exon in some of the single cell clones selected through GFP expression. Single cell clones were expanded and subject to PCR-based genotyping to screen for successful editing by the two guides ("2-cut").

#### **Viral FBXW7 expression plasmids for stable reconstitution or overexpression:**

The following sequences were gene synthesized and subcloned into the MIGR1 retroviral vector with the BglII and EcoRI restriction enzymes – the Kozak sequence, start codon, N-terminal VSVG tag, respective FBXW7 isoform ORF, C-terminal FLAG tag, and two stop codons (TGATAA).

### **CRISPR-Cas9 genome editing and reconstitution**

REH cells were stably transduced with LentiV\_Cas9\_puro (cc60) viral construct, yielding the REHCas9 cells. To generate a pan-FBXW7 KO single-cell clone, REHCas9 cells were transiently transfected with two CRISPR Lenti\_gRNA-GFP(LRG)\_2.1T DNA constructs simultaneously to remove the coding exon 2 of FBXW7. Finally, the pan-FBXW7 KO cells were stably reconstituted with individual FBXW7 isoform MIGR1 retroviral constructs that carried EGFP for Fluorescence-Activated Cell Sorting (FACS) selection.

### **Custom antibody generation**

FBXW7 $\beta$  peptide-KLH conjugate antigen preparation, immunization of BALB/c and C57BL/6 mice, and antiserum preparation were performed by GenScript. Antigen peptide sequences are indicated in Supplemental Figure 4.

**MG132 treatment**

REH cells were left untreated or treated with 1:1000 DMSO vehicle or 10  $\mu$ M MG132 (Peptide Institute 3175-v) for 4 hours in complete RPMI-1640.

**Immunoblot densitometry**

ImageJ bundled with Java 1.8.0\_172 for Mac OS X (NIH) was used for quantification of overexpressed or endogenous FBXW7 protein isoforms. Peak area measurements were normalized to those of GAPDH control, and the values were further divided by those of lane 1.

**SUPPLEMENTAL FIGURES**

**A**

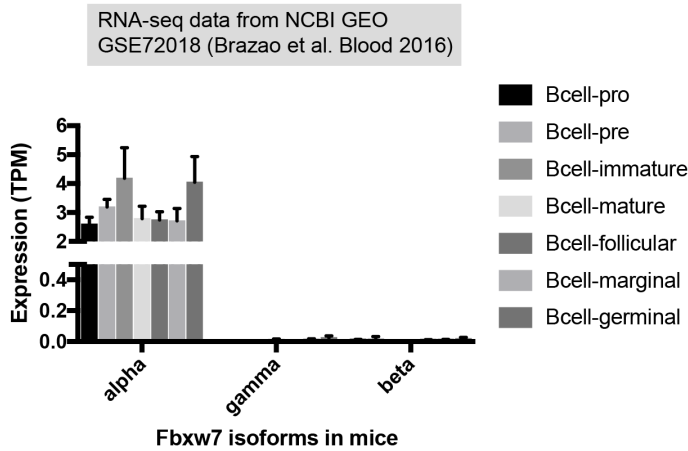

**B**

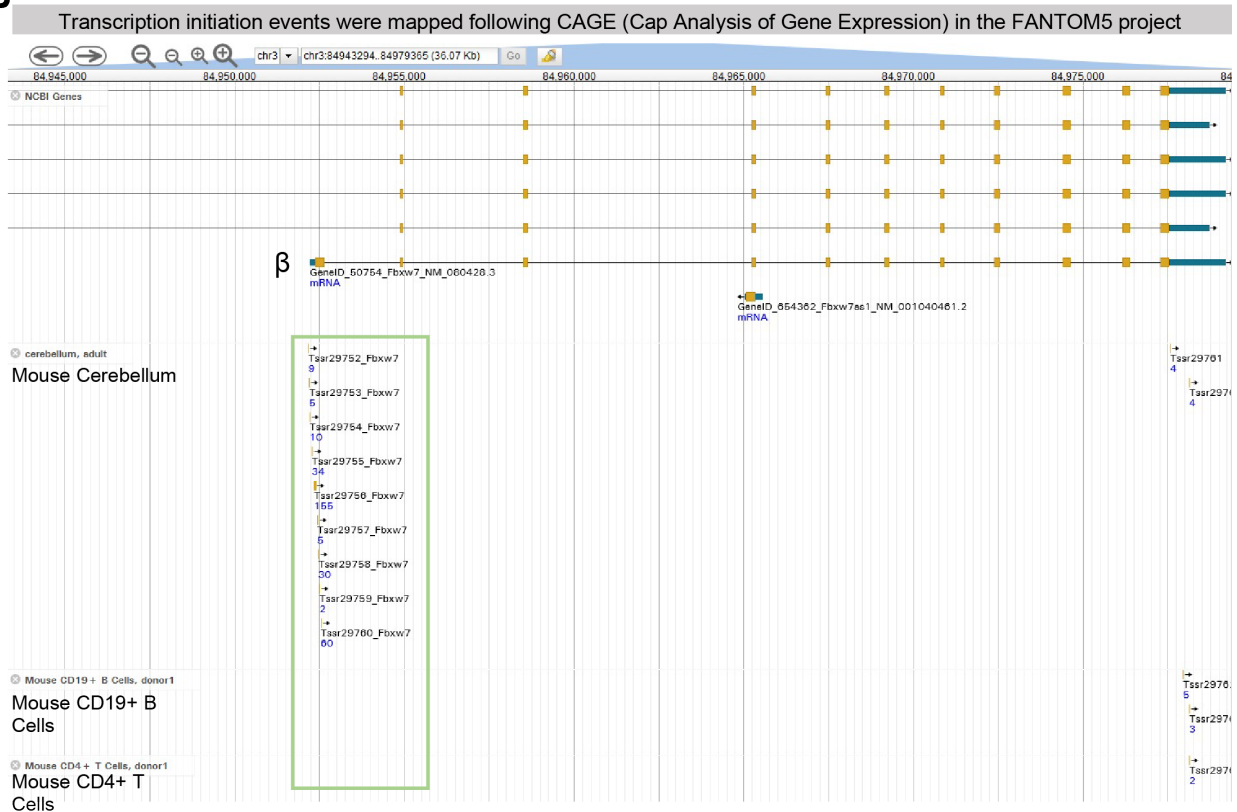

**Supplemental Figure 1. Existing RNA-seq and 5' Cap Analysis of Gene Expression (CAGE) datasets provide no evidence of *Fbxw7 $\beta$*  expression in mouse hematopoietic tissues. (A) RNA-seq of various mouse B-cell subsets from NCBI GEO GSE72018 (Brazao T et al. Blood 2016) was reanalyzed to quantify *Fbxw7* isoform expression. HTSeq v0.8.0 was used in intersection-strict mode against the Ensembl mouse gene annotation (GRCm38/mm10 v87). (B) FANTOM5 CAGE transcriptional start site mapping dataset. Mouse *Fbxw7 $\beta$*  RNA expression is detected in nervous tissues but not in lymphocytes. Viewed on Mouse Genome Informatics (MGI) at Jackson Labs: <https://tinyurl.com/Mm-FBXW7b>**

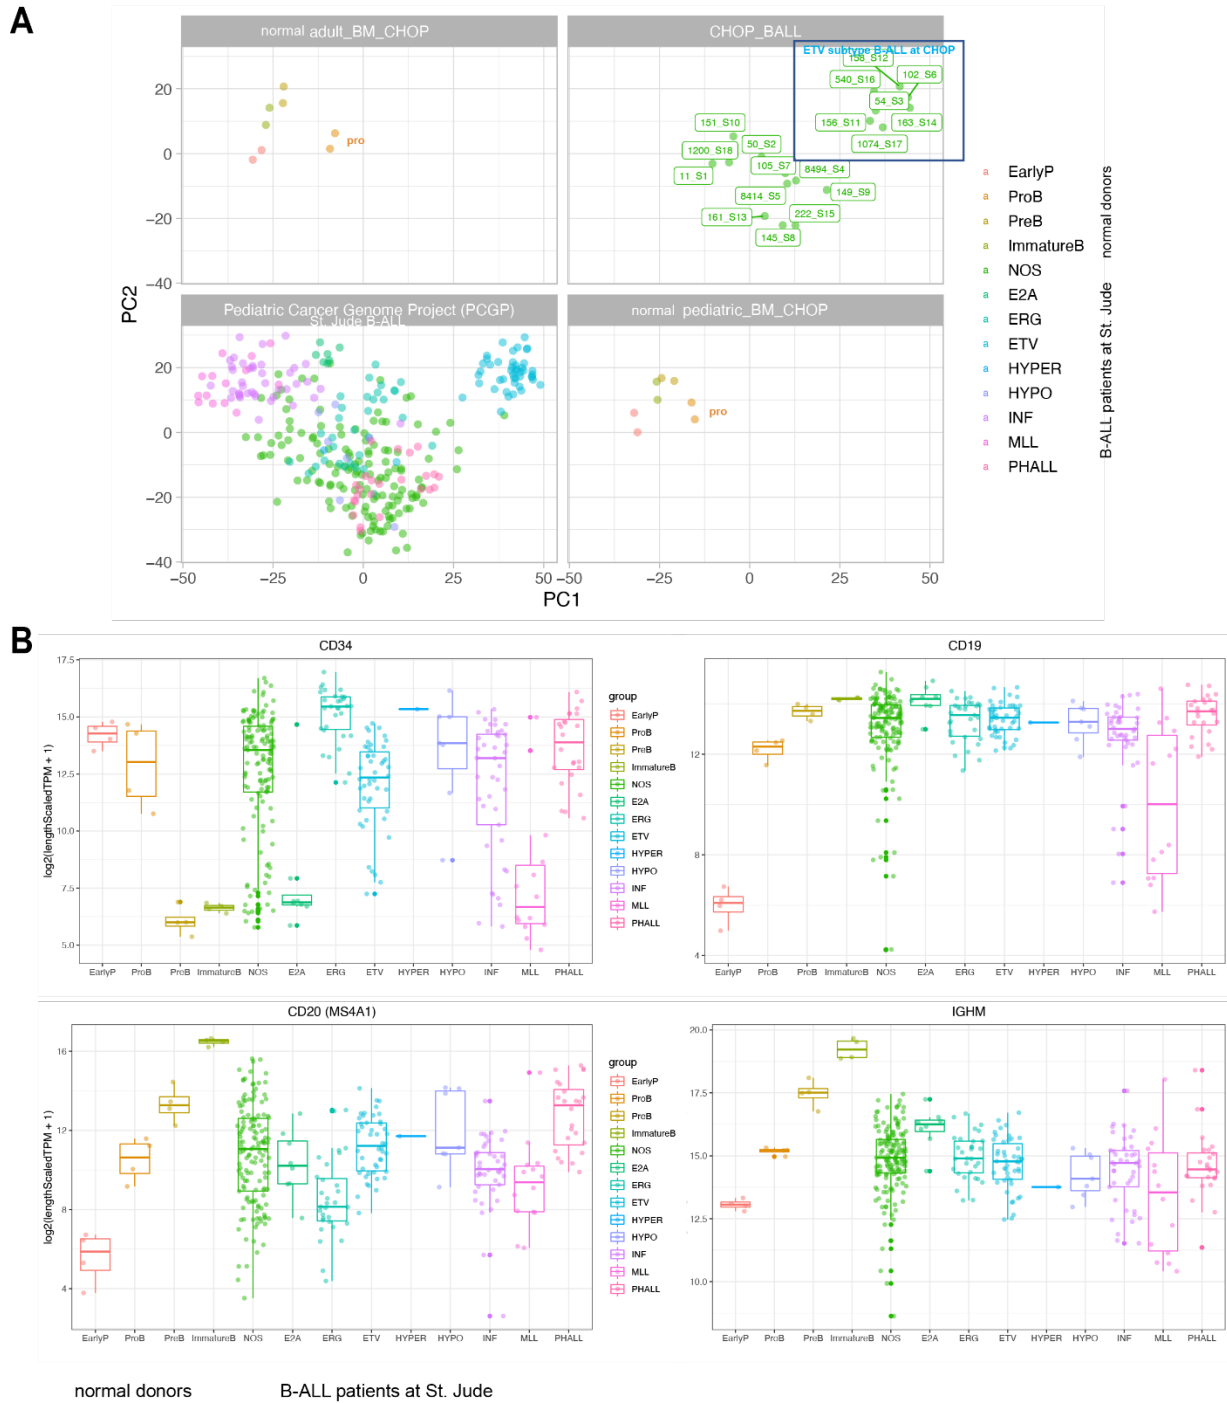

**Supplemental Figure 2. Gene expression of primary B-ALL patient samples compared to normal counterparts. (A)** Principal component analysis of transcriptome profiles of B-ALL patients at Children’s Hospital of Philadelphia (CHOP) (n=18), St. Jude Children’s Hospital (n=313), and normal BM cell subsets (pediatric n=2, adult n=2; total n=4). **(B)** Transcript expression of B-cell and hematopoietic markers in B-ALL patients at St. Jude Children’s Hospital (n=313) and in normal BM cell subsets (early progenitors, pro-, pre-, immature B cells; n=4). Salmon algorithm (<https://combine-lab.github.io/salmon>), tximport, DESeq2, and ggplot2 R packages were used for analysis.

**A**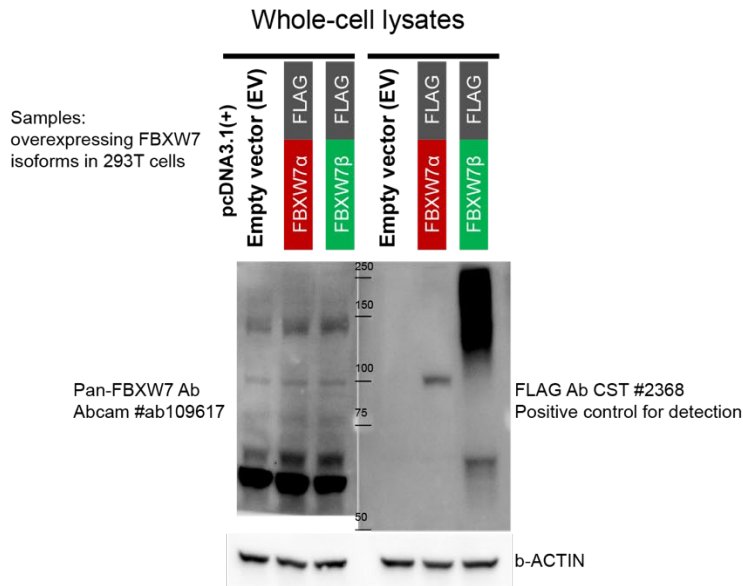**B**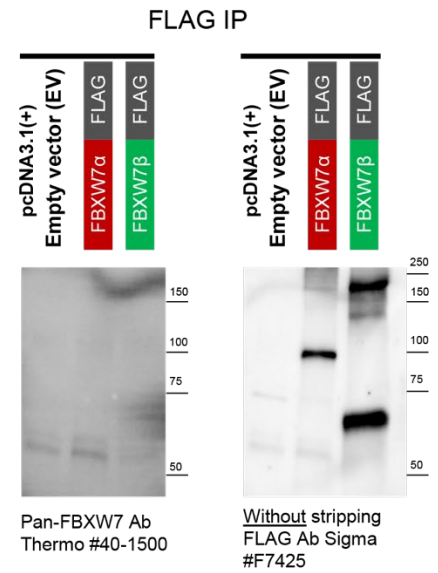

**Supplemental Figure 3. Commercial antibodies against pan-FBXW7 epitopes fail to detect FBXW7 $\beta$ .** (A) Western Blot of 293T cells transiently transfected with *FBXW7* isoform overexpression constructs using various antibodies. (B) 293T cells were transiently transfected with *FBXW7* isoform overexpression constructs, lysed, immunoprecipitated with anti-FLAG agarose beads, and immunoblotted with Thermo #40-1500 FBXW7 antibody first. Without stripping, the same membrane was blotted with FLAG antibody Sigma #F7425. Overexpression of FBXW7 protein isoforms was confirmed with the FLAG antibody.

**A**

Peptide sequence encoded by beta exon  
**Bold:** peptide antigen for raising custom mouse antisera

1st attempt: MCVPRSGILSCLICLYCGVLLPVLLPNLPFLTCLSMSTLESVYTLPEKGLYCQRLPSSR**THGGTESLKGNKTE**NMGFYGLTKMIFYK  
 2nd attempt: MCVPRSGILSCLICLYCGVLLPVLLPNLPFLT**CLSMSTLESVYTLPEKGLYCQRLPSSRTHGGTESLKGNKTE**NMGFYGLTKMIFYK

**B**

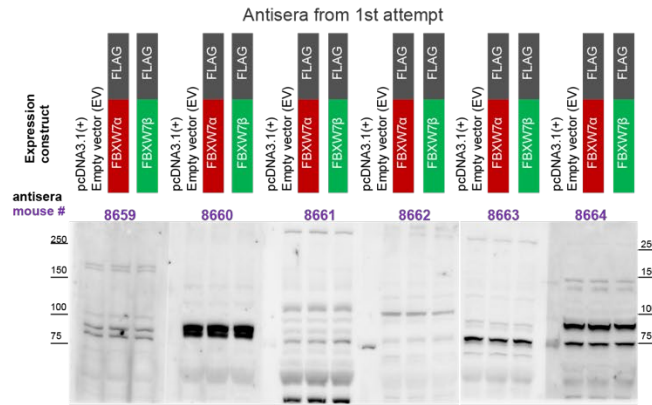

**C**

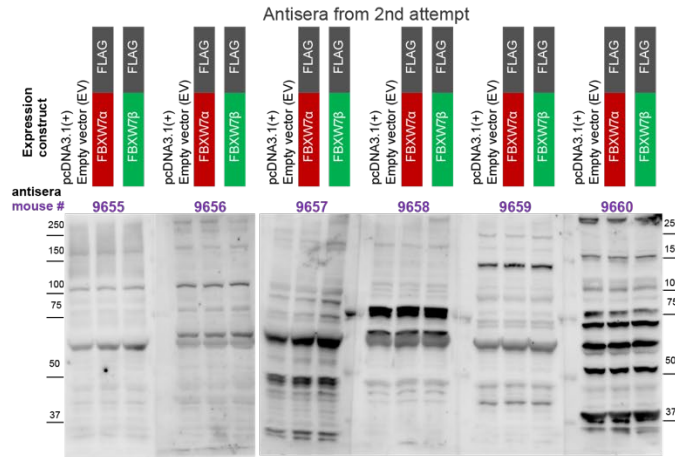

**D**

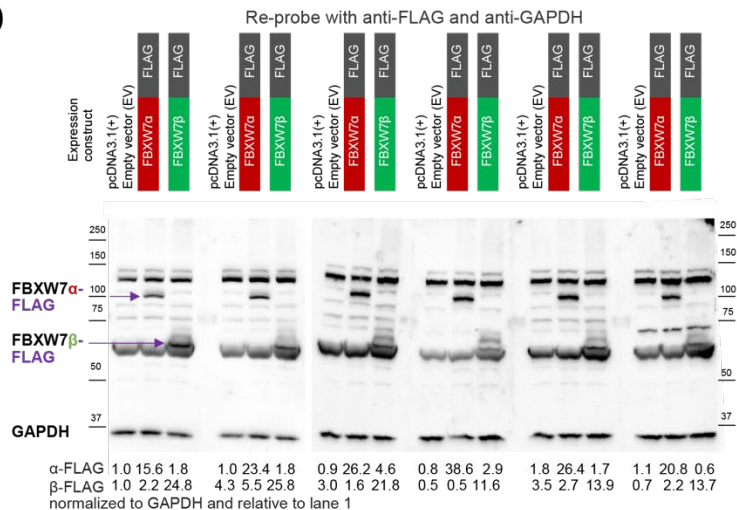

**Supplemental Figure 4. Attempts to generate FBXW7 $\beta$ -specific antibodies did not lead to successful protein detection. (A)** Amino acid sequence encoded by the FBXW7  $\beta$  exon. Highlighted sequences were used as two different immunogens for two antisera generation attempts. **(B)(C)** Antisera Western Blot compared to **(D)** anti-FLAG Western Blot in 293T cells transiently transfected with FBXW7 isoform overexpression constructs. Presence of overexpressed isoforms was confirmed after stripping anti-FBXW7 $\beta$  sera and re-probing with anti-FLAG (Sigma #F7425).



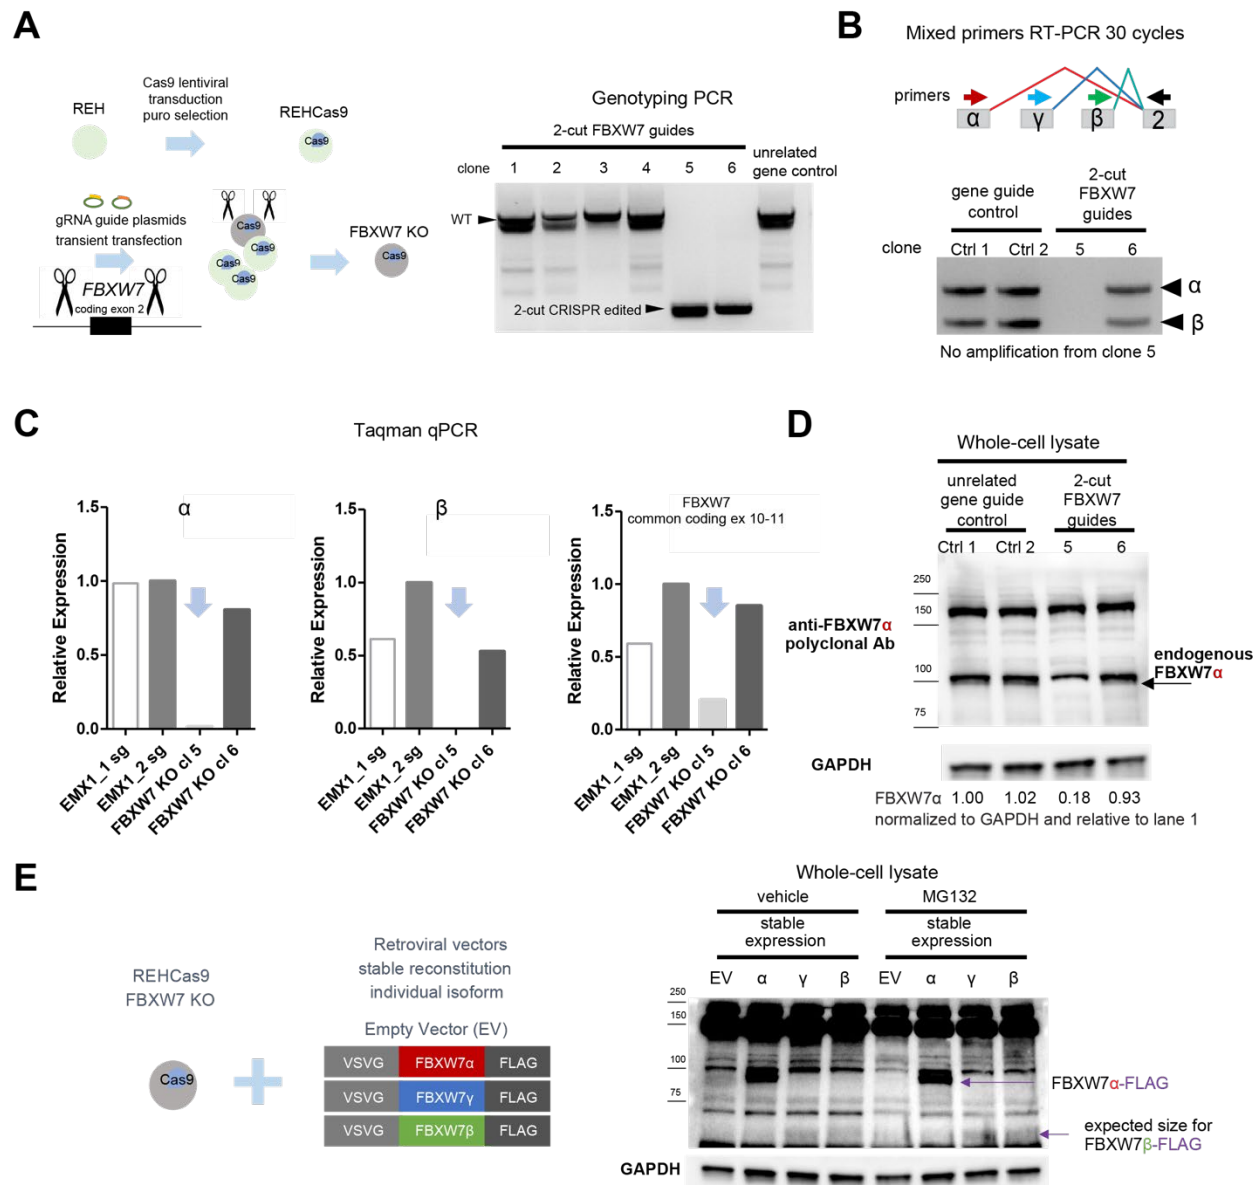

**Supplemental Figure 5. Generation of pan-FBXW7 KO REHCas9 single cell clone with 2-cut CRISPR-Cas9 genome editing followed by reconstitution. (A)** Genotyping KO single cell clones with genomic DNA PCR: short amplicon reflects removal of *FBXW7* coding exon 2 shared by all isoforms. The control sample was transfected with one CRISPR guide targeting an unrelated gene *EMX1*. **(B)** Mixed primers RT-PCR (30 cycles) to examine RNA expression of KO single cell clone after 2-cut CRISPR-Cas9 genome editing. **(C)** Taqman qPCR to examine RNA expression of KO single cell clone after 2-cut CRISPR-Cas9 genome editing. Transcript quantity was relative to control sample *EMX1\_2 sg*, where one CRISPR guide was used to target the unrelated gene *EMX1*. **(D)** Lack of FBXW7 $\alpha$  protein expression in KO single cell clone, Western Blot with anti-FBXW7 $\alpha$  (Bethyl rabbit polyclonal #A301-720A). **(E)** Stable reconstitution of REHCas9 FBXW7 KO cells followed by Western Blot with anti-FLAG (CST #2368). FBXW7 $\alpha$ -FLAG protein is readily detected. FBXW7 $\beta$ -FLAG is detected at ~64 kDa. MG132 treatment does not affect FBXW7 protein levels. Results representative of 3 independent experiments.

## SUPPLEMENTAL TABLES

| Supplemental Table 1. Taqman real-time qPCR primers and probes |                 |                                                                              |
|----------------------------------------------------------------|-----------------|------------------------------------------------------------------------------|
| Target                                                         | Type            | Sequence 5'->3'                                                              |
| FBXW7al                                                        | Primer 1        | CGA ACT CCA GTA GTA TTG TGG ACC T                                            |
|                                                                | Primer 2        | TTC TTT TCA TTT TTG TTG TTT TTG TAT AGA                                      |
|                                                                | PrimeTime Probe | /56-FAM/CC CGT TCA C/ZEN/C AAC TCT CCT CCC CA/3IABkFQ/                       |
| FBXW7ga                                                        | Primer 1        | GAG CCT CTA CCA CAT CAA ACT                                                  |
|                                                                | Primer 2        | AAA GAG CGG ACC TCA GAA CC                                                   |
|                                                                | PrimeTime Probe | /56-FAM/AG CAT TAG C/ZEN/A TCA TTG CCC AAG GC/3IABkFQ/                       |
| FBXW7be                                                        | Primer 1        | CAG CCG GAC ACA CGG G                                                        |
|                                                                | Primer 2        | GGT CCA ACT TTC TTT TCA TTT TGT AAA                                          |
|                                                                | PrimeTime Probe | /56-FAM/AA ATA CAG A/ZEN/A AAT ATG GGT TTC TAC GGC ACA TTA AAA ATG /3IABkFQ/ |
| FBXW7common(ex10-11)                                           | Primer 1        | TGG GAT ATC AAA ACA GGA CAG TGT                                              |
|                                                                | Primer 2        | TAA ACA GGT CAC AGC ACT CTG ATG                                              |
|                                                                | PrimeTime Probe | /56-FAM/ACAAACATT/ZEN/GCAAGGTCCCAACAAG/3IABkFQ/                              |
| GAPDH                                                          | Primer 1        | TGT AGT TGA GGT CAA TGA AGG G                                                |
|                                                                | Primer 2        | ACA TCG CTC AGA CAC CAT G                                                    |
|                                                                | PrimeTime Probe | /56-FAM/AA GGT CGG A/Zen/G TCA ACG GAT TTG GTC /3IABkFQ/                     |
| CD52                                                           | Primer 1        | GTT TGG CTG GTG TCG TTT                                                      |
|                                                                | Primer 2        | GCC ACG AAG ATC CTA CCA AA                                                   |
|                                                                | PrimeTime Probe | /56-FAM/TGA GAG TCC /ZEN/AGT TTG TAT CTG TAC CAT AAC CA/3IABkFQ/             |
| LST1                                                           | Primer 1        | GTC CCT GAT CCC TGA CCT AA                                                   |
|                                                                | Primer 2        | GAA GGA CCA CTG CCA GAA G                                                    |
|                                                                | PrimeTime Probe | /56-FAM/TCG CGG AAT /ZEN/GAT GAT ATA TGT ATC TAC GGG /3IABkFQ/               |
| LTB                                                            | Primer 1        | CAG CTG CCC ACC TCA TAG                                                      |
|                                                                | Primer 2        | ACA GTA GAG GTA ATA GAG GCC G                                                |
|                                                                | PrimeTime Probe | /56-FAM/AAA CGC CTG /ZEN/TTC CTT CGT CGT CT/3IABkFQ/                         |
| MME                                                            | Primer 1        | AAG AAA CAG CGA TGG ACT CC                                                   |
|                                                                | Primer 2        | GCA GCT GAT TTT ATG CAG TCT G                                                |
|                                                                | PrimeTime Probe | /56-FAM/AGG AGC AGG /ZEN/ACA AGG ACC GAG A/3IABkFQ/                          |
| FRG2C                                                          | Primer 1        | TTC CAA GGA TAT CTG CCA AGA C                                                |
|                                                                | Primer 2        | CAG CAG TGG AGG ATC TTG ATT                                                  |
|                                                                | PrimeTime Probe | /56-FAM/CCA GAA GAG /ZEN/GAG TGC AAC TTG ACG T/3IABkFQ/                      |
| PCDH10                                                         | Primer 1        | CTC AGT GCA ATT GGA GAA GAG A                                                |
|                                                                | Primer 2        | CCA GGA AGC CGA CAT AGT AAG                                                  |
|                                                                | PrimeTime Probe | /56-FAM/AGT GGT CAT /ZEN/GGA GAC AGT GAA CAG G/3IABkFQ/                      |

| <b>Supplemental Table 2. Regular PCR primers</b> |                         |
|--------------------------------------------------|-------------------------|
| RT-PCR mixed primers                             | Sequence 5'→3'          |
| FBXW7_syy_al_F                                   | CAGCAAAAGACGACGAACTGG   |
| FBXW7_syy_ga_F                                   | CAGGACATTTGGTAGGGGAAGG  |
| FBXW7_syy_be_F                                   | TGACAGGGCATAGTCTCCTCC   |
| FBXW7_syy_2_R                                    | AAAGAGCGGACCTCAGAACC    |
| Genotyping PCR primers flanking coding exon 2    | Sequence 5'→3'          |
| FBXW7_syy_gD2_F                                  | AGCCTAATAACTGTGAGAGTGGG |
| FBXW7_syy_gD2_R                                  | AAGGGAAGAAACCAGCCAGATC  |

| <b>Supplemental Table 3. CRISPR guide and Morpholino sequences</b> |                      |                                                           |
|--------------------------------------------------------------------|----------------------|-----------------------------------------------------------|
| CRISPR guide combination for coding exon 2 removal                 |                      |                                                           |
| CRISPR guide                                                       | Sequence 5'→3'       |                                                           |
| all FBXW7_sg#1                                                     | CTTACGACATTAGGGGCTAG |                                                           |
| all FBXW7_sg#2                                                     | CTAGGGTAGACATTTATGTA |                                                           |
| Morpholinos                                                        |                      |                                                           |
| Target                                                             | Name                 | Sequence 5'→3'                                            |
| FBXW7al                                                            | MOalpha              | ATTGAATATACTCACTTTTGTGTT                                  |
| FBXW7ga                                                            | MOgamma              | TTCAAATGTGTGAGACTTACCCGTC                                 |
| FBXW7be                                                            | MObeta               | GAAGAAAACAGCTTACTTACTTTGT                                 |
| Random control oligo                                               | MOctrl               | 25N, mixture of up to 4 <sup>25</sup> different sequences |

| <b>Supplemental Table 4. Key flow cytometry and immunoblotting reagents</b> |                           |                 |                |
|-----------------------------------------------------------------------------|---------------------------|-----------------|----------------|
| Flow cytometry reagents                                                     |                           |                 |                |
| Specificity                                                                 | Fluorochrome              | Manufacturer    | Catalog Number |
| Human TruStain FcX                                                          |                           | Biolegend       | 422302         |
| CD34                                                                        | PE                        | Beckman Coulter | IM1459U        |
| IgM                                                                         | FITC                      | Beckman Coulter | B30655         |
| CD19                                                                        | APC                       | Beckman Coulter | IM2470U        |
| IgD                                                                         | PE                        | Thermo Fisher   | 12-9868        |
| Immunoblotting antibodies                                                   |                           |                 |                |
| Specificity                                                                 | Manufacturer              | Catalog Number  |                |
| FLAG                                                                        | Cell Signaling Technology | 2368S           |                |
| FLAG                                                                        | Sigma                     | F7425           |                |
| FBXW7                                                                       | Abcam                     | ab109617        |                |
| FBXW7                                                                       | Thermo Fisher             | 40-1500         |                |
| FBXW7 $\alpha$                                                              | Bethyl                    | A301-720A       |                |
| $\beta$ -ACTIN HRP                                                          | Cell Signaling Technology | 12262           |                |
| GAPDH HRP                                                                   | Cell Signaling Technology | 3683S           |                |
| anti-mouse IgG HRP                                                          | Cytiva                    | NA931-1ML       |                |
| anti-rabbit IgG HRP                                                         | Cytiva                    | NA934-1ML       |                |

**Supplemental Table 5. List of 150 genes harboring Local Splicing Variants denoted in Venn Diagram intersection in Fig 1B.**

|                 |             |                 |
|-----------------|-------------|-----------------|
| ABHD15-AS1      | HOMEZ       | RANBP1          |
| AC093642.3      | IDS         | RBSN            |
| AKAP9           | IFT122      | RCOR3           |
| ALKBH4          | IGHG1       | RHOT1           |
| ANKRD36         | IGHG2       | RNFT1           |
| ANKRD36B        | IL3RA       | RP11-1023L17.1  |
| ARL17B          | INTS4       | RP11-1212A22.1  |
| ASPH            | INVS        | RP11-156P1.3    |
| ATG9A           | IP6K2       | RP11-164J13.1   |
| BCOR            | ITFG2       | RP11-178C3.1    |
| BCORL1          | JPX         | RP11-33N16.3    |
| BMS1P20         | KB-1572G7.2 | RP11-43F13.1    |
| C14ORF159       | KIAA0125    | RP11-514P8.7    |
| C1QTNF3-AMACR   | KLC1        | RP11-798G7.5    |
| C8ORF58         | L3MBTL1     | RP11-864I4.1    |
| C9ORF156        | LHPP        | RP11-875O11.1   |
| CA5BP1          | LINC00893   | RP3-477O4.14    |
| CAPN15          | LINC01237   | RP4-717I23.3    |
| CAPN3           | LRRC27      | RPP14           |
| CASP8           | LRRC37A     | RRP7BP          |
| CCDC39          | LRRC37A4P   | RSRC2           |
| CENPO           | LUC7L3      | RSRP1           |
| CEP250          | MGME1       | S100A13         |
| CTBP2           | MLLT10      | S100PBP         |
| CTD-3092A11.1   | MRS2        | SCMH1           |
| DHX34           | MSTO2P      | SCYL3           |
| EDRF1           | MTERF4      | SELO            |
| ELMOD3          | NAT1        | SFXN2           |
| ENSG00000163386 | NDUFAB6     | SGK3            |
| ENSG00000225241 | NPIPB3      | SLC16A1-AS1     |
| ENSG00000231486 | NPIPB5      | SMG1P5          |
| ENSG00000232637 | OGG1        | SRP14-AS1       |
| ENSG00000255168 | OVOL2       | STAG3L1         |
| FAM111A         | PACRGL      | STRN3           |
| FAM122C         | PARG        | TCAIM           |
| FAM173B         | PAX8        | TCEB3-AS1       |
| FAM228B         | PAX8-AS1    | TCTN1           |
| FANCA           | PCBP1-AS1   | TMEM128         |
| FANCD2          | PCNX        | TMEM161B-AS1    |
| FBXO41          | PFKM        | TNFSF12         |
| FBXW7           | PIGL        | TNFSF12-TNFSF13 |
| GALK2           | PKD1P1      | UBC             |
| GKAP1           | PLGLB1      | WDR27           |
| GSN             | PMS2P4      | WIBG            |
| GTPBP10         | POLR2J3     | ZNF131          |
| HERC2P3         | PIIP5K1     | ZNF250          |
| HLA-DRB5        | PRDM2       | ZNF254          |
| HLA-G           | PREPL       | ZNF273          |
| HLA-K           | PSMC6       | ZNF551          |
| HMGCR           | PTAR1       | ZNF83           |

**Supplemental Table 6. List of 188 genes differentially expressed in FBXW7 alpha vs beta knockdown cells (MO $\alpha$  vs MO $\beta$ ).** Per Gene Set Enrichment Analysis (collection C5 at [www.gsea-msigdb.org](http://www.gsea-msigdb.org)), they are enriched in the following top 10 biological processes: dry skin, calcium ion binding, regulation of cell death, tissue development, growth, biological adhesion, Golgi apparatus, regulation of growth, cell-cell signaling, and structural molecule activity. List ranked by log<sub>2</sub>FoldChange of genes expressed in MO $\alpha$  relative to MO $\beta$ .

|                     |                     |                     |                     |
|---------------------|---------------------|---------------------|---------------------|
| 1. ENSG00000263244  | 56. CTPS2           | 111.HR              | 166.CCDC198         |
| 2. OLR1             | 57. CDKN2A          | 112.ZHX3            | 167.IGFBP1          |
| 3. ENSG00000280571  | 58. H2BC20P         | 113.NQO1            | 168.PPARGC1A        |
| 4. C19orf33         | 59. SMN1            | 114.KCNJ2           | 169.CPA4            |
| 5. KRT6A            | 60. ENSG00000279149 | 115.CDH24           | 170.ACAN            |
| 6. PINX1            | 61. NIT2            | 116.PURPL           | 171.LINC01139       |
| 7. KRT18            | 62. PLCH1           | 117.PCDH10          | 172.BMP4            |
| 8. GALNT6           | 63. DPEP1           | 118.ENSG00000259660 | 173.ALDH3A1         |
| 9. ACOX2            | 64. FRG2B           | 119.TMC8            | 174.FLG             |
| 10. MSLN            | 65. FRG2C           | 120.ZNF467          | 175.FBXO10          |
| 11. SH3RF2          | 66. FAXC            | 121.MC1R            | 176.ENSG00000224066 |
| 12. KRT8            | 67. SMAD9           | 122.XKR4            | 177.ENSG00000232725 |
| 13. ENSG00000225339 | 68. PTPN22          | 123.DENND2B         | 178.SMIM11B         |
| 14. PLPP2           | 69. ENSG00000263731 | 124.IGFBP4          | 179.HDX             |
| 15. SMOC1           | 70. ENSG00000268205 | 125.ENSG00000124224 | 180.PRDM6           |
| 16. FAM83A          | 71. TMSB4XP4        | 126.BMP3            | 181.ENSG00000267459 |
| 17. ALPP            | 72. SELL            | 127.ARSJ            | 182.ENSG00000284969 |
| 18. DAW1            | 73. LTB             | 128.EGR1            | 183.GAPDHP62        |
| 19. ENSG00000281379 | 74. CD52            | 129.ZCCHC18         | 184.ENSG00000261641 |
| 20. PDE1C           | 75. MPO             | 130.PMEPA1          | 185.ENSG00000224837 |
| 21. FOLR1           | 76. MAP2            | 131.NRXN1           | 186.RPL21P16        |
| 22. NPTX1           | 77. ENSG00000210082 | 132.SDC2            | 187.RMRP            |
| 23. NKD1            | 78. SYNGR1          | 133.WWTR1           | 188.RPL36AP37       |
| 24. SCHIP1          | 79. CPZ             | 134.PTPN4           |                     |
| 25. KRT80           | 80. LST1            | 135.SCARA3          |                     |
| 26. ANXA3           | 81. NNMT            | 136.ALPK2           |                     |
| 27. MTARC1          | 82. HYPK            | 137.KCNJ2-AS1       |                     |
| 28. FAM153A         | 83. ARL17B          | 138.MBNL1-AS1       |                     |
| 29. ARAP3           | 84. GBP4            | 139.KRT19           |                     |
| 30. EPPK1           | 85. DHCR7           | 140.WFDC1           |                     |
| 31. CELSR1          | 86. LMO2            | 141.C11orf87        |                     |
| 32. WWC1            | 87. MRPL10          | 142.RNF144B         |                     |
| 33. MISP            | 88. MME             | 143.OLFML3          |                     |
| 34. TINAGL1         | 89. NRN1            | 144.NEB             |                     |
| 35. PCDHB2          | 90. FBXW7           | 145.SLC4A4          |                     |
| 36. LINC00114       | 91. PCDH9           | 146.TXK             |                     |
| 37. PCAT2           | 92. DNAJB2          | 147.ENSG00000261434 |                     |
| 38. ZDHHC21         | 93. UVSSA           | 148.LPCAT2          |                     |
| 39. TBX3            | 94. CHD7            | 149.ENSG00000241489 |                     |
| 40. FBXL16          | 95. LANCL2          | 150.FGF5            |                     |
| 41. WDR72           | 96. FGD6            | 151.ENSG00000257386 |                     |
| 42. POSTN           | 97. NBPFF19         | 152.NECTIN4         |                     |
| 43. MAGED4          | 98. NID2            | 153.C13orf46        |                     |
| 44. CASP1           | 99. KCNJ16          | 154.GDF6            |                     |
| 45. ENSG00000262172 | 100.POLH            | 155.POU6F1          |                     |
| 46. CDKN2B          | 101.ENSG00000269837 | 156.OGN             |                     |
| 47. CPLX2           | 102.ABHD4           | 157.LOC105369760    |                     |
| 48. AGR2            | 103.PHLDA3          | 158.KCNMA1          |                     |
| 49. NPAS2           | 104.TENM4           | 159.EYA2            |                     |
| 50. ENSG00000226239 | 105.SAMHD1          | 160.LINC00648       |                     |
| 51. CCDC182         | 106.KDM7A           | 161.P3H2            |                     |
| 52. ARRDC3-AS1      | 107.SLIT2           | 162.BAZ2B           |                     |
| 53. FBLN2           | 108.ATXN7           | 163.ENSG00000243696 |                     |
| 54. NR2F2           | 109.INKA2           | 164.ENSG00000285625 |                     |
| 55. GASK1B          | 110.SLC7A7          | 165.PDE4C           |                     |

**Supplemental Table 7. List of 228 genes differentially expressed in FBXW7 alpha vs beta reconstituted cells (KO +  $\alpha$  vs KO +  $\beta$ ).** Per Gene Set Enrichment Analysis (collection C5 at [www.gsea-msigdb.org](http://www.gsea-msigdb.org)), they are enriched in the following top 10 biological processes: intrinsic component of plasma membrane, locomotion, neurogenesis, cell morphogenesis, cell projection organization, cell-cell adhesion, biological adhesion, taxis, cell migration, and ion transport. List ranked by log2FoldChange of genes expressed in KO +  $\alpha$  relative to KO +  $\beta$ .

|                     |                     |                     |                     |
|---------------------|---------------------|---------------------|---------------------|
| 1. ENSG00000261093  | 58. TBC1D30         | 115.FOXO6           | 172.ANO2            |
| 2. FAM86B2          | 59. ENSG00000237356 | 116.SYT1            | 173.TRDV2           |
| 3. USP41            | 60. OTOGL           | 117.MLLT11          | 174.CACNA1E         |
| 4. CBSL             | 61. ITGAL           | 118.MYO10           | 175.LTA             |
| 5. ENSG00000283228  | 62. SOHLH2          | 119.IRX3            | 176.ELN             |
| 6. BDNF-AS          | 63. CEACAM21        | 120.PCDHB13         | 177.TRPM2           |
| 7. ENSG00000261459  | 64. ENSG00000270112 | 121.LFNG            | 178.RCAN3           |
| 8. ENSG00000285000  | 65. FAM53A          | 122.ARHGAP24        | 179.IL6ST           |
| 9. LINC01159        | 66. VWA8            | 123.BBS9            | 180.LOC102723996    |
| 10. FAAH2           | 67. BCDIN3D-AS1     | 124.SBK1            | 181.LTB             |
| 11. LOC100653049    | 68. SNORC           | 125.PDGFRB          | 182.CASKIN1         |
| 12. EPHA1-AS1       | 69. PCDH1           | 126.USP18           | 183.UMODL1          |
| 13. ZNF287          | 70. SRGAP1          | 127.IFI44           | 184.FGF18           |
| 14. LGR6            | 71. WTIP            | 128.PTPN6           | 185.DNAH10          |
| 15. TDRP            | 72. MYCN            | 129.PABPC4L         | 186.LINC00467       |
| 16. ENSG00000239922 | 73. PDZRN4          | 130.CDKN2C          | 187.EIF3CL          |
| 17. PECAM1          | 74. NIPSNAP3B       | 131.PALM            | 188.GPX3            |
| 18. MIR646HG        | 75. PCDH10          | 132.SP4             | 189.TMC8            |
| 19. PKHD1L1         | 76. KLHDC7A         | 133.SNHG5           | 190.PPL             |
| 20. ENSG00000244558 | 77. WNK3            | 134.FBXW7           | 191.PAWR            |
| 21. RAPSN           | 78. LUCAT1          | 135.SNHG3           | 192.MME             |
| 22. PIP4K2C         | 79. DSC3            | 136.SH3KBP1         | 193.IL16            |
| 23. SLCO2B1         | 80. NRP1            | 137.LIMD2           | 194.GRIN2B          |
| 24. SGMS2           | 81. DAPK1           | 138.ENSG00000281398 | 195.ENSG00000271046 |
| 25. RHPN2           | 82. HDAC9           | 139.RFTN1           | 196.MEG9            |
| 26. SLC5A2          | 83. GNG11           | 140.FRGC2C          | 197.C3              |
| 27. IMPACT          | 84. ARSG            | 141.PAG1            | 198.FANCB           |
| 28. ENSG00000258590 | 85. SLITRK1         | 142.RASD1           | 199.MYOM1           |
| 29. RTBDN           | 86. GPER1           | 143.PPM1F           | 200.ENSG00000225096 |
| 30. DOCK1           | 87. MBP             | 144.DTX1            | 201.MPDZ            |
| 31. CHRM2           | 88. MAP1A           | 145.SNHG26          | 202.PRODH           |
| 32. CFAP299         | 89. BIN1            | 146.NETO1           | 203.DIO2            |
| 33. TTC38           | 90. LINC00158       | 147.MT2A            | 204.LINC00670       |
| 34. ENSG00000264058 | 91. HBEGF           | 148.LINGO3          | 205.EVA1A           |
| 35. ZNF521          | 92. SLCO5A1         | 149.CD19            | 206.DIO2-AS1        |
| 36. CDH12           | 93. ENSG00000272933 | 150.LCK             | 207.DNAAF8          |
| 37. CHURC1-FNTB     | 94. LPAR4           | 151.ZNF423          | 208.PLA2G10         |
| 38. IDI2-AS1        | 95. TFPI            | 152.ERMAP           | 209.MYO16           |
| 39. KRT18P27        | 96. DSC2            | 153.DOCK9           | 210.OR2A42          |
| 40. DNAH14          | 97. ENSG00000272070 | 154.RIPOR2          | 211.ENSG00000271893 |
| 41. PCDH10-DT       | 98. SPTBN2          | 155.LOC105375924    | 212.ENSG00000279593 |
| 42. ATP1A2          | 99. IFI27L2         | 156.KCNK12          | 213.PRRG1           |
| 43. TRPS1           | 100.FAT4            | 157.TNF             | 214.TBR1            |
| 44. ENSG00000271930 | 101.RGMA            | 158.COL5A1          | 215.ANO9            |
| 45. TLR7            | 102.AGAP1           | 159.BEST3           | 216.STAB2           |
| 46. SSPN            | 103.ZNF469          | 160.SEMA6A          | 217.ENSG00000233974 |
| 47. PPP1R14A        | 104.VPS13B          | 161.TRAC            | 218.MUC5B           |
| 48. KIF26B          | 105.NTRK1           | 162.SLC35E3         | 219.LPAL2           |
| 49. ENSG00000258592 | 106.HIC1            | 163.SPAG1           | 220.RYR1            |
| 50. ZNF385D         | 107.RGL1            | 164.CD52            | 221.LHX1            |
| 51. SALL1           | 108.CAMK2D          | 165.FLT1            | 222.CCR6            |
| 52. LHX9            | 109.OPN3            | 166.ENSG00000204282 | 223.ZSWIM8-AS1      |
| 53. CAP2            | 110.PKIG            | 167.LST1            | 224.TMEM265         |
| 54. LIPI            | 111.ABCA9           | 168.ICOSLG          | 225.SCARNA2         |
| 55. ENSG00000227579 | 112.ZNRF1           | 169.BGTT1           | 226.ENSG00000196302 |
| 56. XYLT1           | 113.CD248           | 170.MT1X            | 227.ENSG00000280064 |
| 57. SRSF12          | 114.SEMA3D          | 171.TMEM52          | 228.ENSG00000259948 |

**Supplemental Table 8. Top 300 genes whose expression highly correlates with FBXW7 beta exon usage in the St. Jude B-ALL patient cohort.** The genes identified in both knockdown and reconstitution experiments (MME/CD10, LTB, CD52, and LST1) were ranked between 22nd and 256th out of the 41,275 genes whose RNA expression were analyzed, or in the top 0.62%. Some other genes that highly correlated with FBXW7 beta-exon usage (ADGRG1, ECM1, PTP4A3, and CD200) mapped to the locomotion and cell migration biological processes annotated by collection C5 on the Gene Set Enrichment Analysis website ([www.gsea-msigdb.org](http://www.gsea-msigdb.org)).

|                               |                               |                               |                               |
|-------------------------------|-------------------------------|-------------------------------|-------------------------------|
| 1. LINC02273                  | 76. CORO6                     | 151. OR4Q3                    | 226. MRPL49P2                 |
| 2. VWA2                       | 77. ASB13                     | 152. CD27-AS1                 | 227. AC027309.1               |
| 3. FBXW7-AS1                  | 78. CD27                      | 153. SCNN1A                   | 228. LRRC70                   |
| 4. TMEM236                    | 79. AP002761.3                | 154. AL139246.2               | 229. LINC01507                |
| 5. AC097375.4                 | 80. LINC02538                 | 155. AC108724.2               | 230. LIMK2                    |
| 6. SERPINB9                   | 81. AC010260.1                | 156. AC025423.4               | 231. MAPRE1P1                 |
| 7. ZC3H12D                    | 82. LINC02452                 | 157. MDS2                     | 232. ARHGAP42P4               |
| 8. TSPAN7                     | 83. RGL1                      | 158. ABCA4                    | 233. AL512310.2               |
| 9. BLACE                      | 84. DUSP27                    | 159. MSR1                     | 234. PLCH1                    |
| 10. SPAAR                     | 85. AC025423.3                | 160. KHDRBS3                  | 235. AC139769.3               |
| 11. ADGRG1                    | 86. AC004466.1                | 161. GOLGA8B                  | 236. PFN1P6                   |
| 12. ECM1                      | 87. AC139769.2                | 162. LINC02571                | 237. ZNF90                    |
| 13. ELFN2                     | 88. NBPF15                    | 163. AC087752.3               | 238. MYLK                     |
| 14. FP325335.1                | 89. LINC02487                 | 164. NPAP1P6                  | 239. AL161782.1               |
| 15. MME-AS1                   | 90. ARHGEF17                  | 165. EMP2                     | 240. NRP1                     |
| 16. PTP4A3                    | 91. HDAC7                     | 166. AC025423.2               | 241. AL713998.1               |
| 17. CD200                     | 92. RPL23AP49                 | 167. AC129915.3               | 242. AL021408.2               |
| 18. CTDSPL                    | 93. SLC2A7                    | 168. AL355916.3               | 243. MRV11-AS1                |
| 19. Z94160.2                  | 94. CRELD2                    | 169. AL669970.1               | 244. TRERNA1                  |
| 20. SLC35E3                   | 95. AC007207.1                | 170. SYNPO2                   | 245. AC006487.1               |
| 21. AC008149.1                | 96. CNKSR3                    | 171. MZB1                     | 246. CA6                      |
| 22. MME                       | 97. DUX4L26                   | 172. TNRC6C-AS1               | 247. ABLIM1                   |
| 23. TMPRSS11E                 | 98. AC009271.1                | 173. MDM2                     | 248. AC025754.1               |
| 24. PRX                       | 99. LGMN                      | 174. AC018552.3               | 249. MRGPRG-AS1               |
| 25. AC004704.1                | 100. LINC01416                | 175. VAMP5                    | 250. SLC37A3                  |
| 26. AC093916.1                | 101. TP53INP1                 | 176. AL161912.4               | 251. SSX2                     |
| 27. S100Z                     | 102. MIR4520-1                | 177. TDRD1                    | 252. TGM7                     |
| 28. ZNF793                    | 103. SOAT2                    | 178. SFXN1                    | 253. CYTL1                    |
| 29. LARGE2                    | 104. LINC01224                | 179. RIPOR2                   | 254. RPL10P19                 |
| 30. C2orf73                   | 105. AL513523.2               | 180. AL354993.2               | 255. DPEP1                    |
| 31. SCHIP1                    | 106. AC069272.1               | 181. AL356234.2               | 256. LST1                     |
| 32. IQCJ-SCHIP1               | 107. NDUFAF6                  | 182. AC027277.1               | 257. AGGF1P3                  |
| 33. AC069023.1                | 108. B4GALT6                  | 183. CEP68                    | 258. NLRP12                   |
| 34. AC079340.2                | 109. AF067845.5               | 184. GPR17                    | 259. SIDT1                    |
| 35. AC139718.2                | 110. RAI14                    | 185. AL645939.1               | 260. ACVR1C                   |
| 36. LINC01922                 | 111. RPS6KA2-IT1              | 186. AC079776.4               | 261. NEURL1B                  |
| 37. MRC1                      | 112. ELK3                     | 187. PEAK1                    | 262. BMPR1B                   |
| 38. MAMLD1                    | 113. AC006305.1               | 188. OR2B6                    | 263. KCNA2                    |
| 39. AFAP1L2                   | 114. FAR2P1                   | 189. CSMD2                    | 264. DENND3                   |
| 40. RIPPLY3                   | 115. ZEB1-AS1                 | 190. SERINC5                  | 265. AC011095.1               |
| 41. TSPAN15                   | 116. LTB                      | 191. CLIC5                    | 266. HACD1                    |
| 42. ZNF793-AS1                | 117. AC139769.1               | 192. GPA33                    | 267. TMEM263                  |
| 43. NT5E                      | 118. SHISA9                   | 193. AL161912.1               | 268. NPR1                     |
| 44. AC092894.1                | 119. LINC01539                | 194. AL669970.3               | 269. AF067845.2               |
| 45. AC100797.5                | 120. XG                       | 195. TMC6                     | 270. ORMDL3                   |
| 46. RNU6ATAC36P               | 121. SDK2                     | 196. HNRNPA1P70               | 271. AL136309.3               |
| 47. IFNG-AS1                  | 122. NR3C2                    | 197. MRV11                    | 272. IL26                     |
| 48. RAB11FIP5                 | 123. LINC01013                | 198. PCLO                     | 273. KLF2P1                   |
| 49. MMP28                     | 124. CREG2                    | 199. GFY                      | 274. DGKA                     |
| 50. ADGRF1                    | 125. PIM1                     | 200. LINC01905                | 275. AL139415.2               |
| <i>continued on next page</i> |



|     |            |      |            |      |            |      |            |
|-----|------------|------|------------|------|------------|------|------------|
| 51. | FBLN5      | 126. | LINC01825  | 201. | CMTM8      | 276. | AC127029.2 |
| 52. | AL355974.2 | 127. | MAP3K19    | 202. | LINC01290  | 277. | AC243967.1 |
| 53. | AC131211.1 | 128. | EGLN1      | 203. | MYO1B      | 278. | LAMB4      |
| 54. | JPH1       | 129. | SEMA6A-AS2 | 204. | AL355916.2 | 279. | AC093278.2 |
| 55. | AC022148.1 | 130. | AC092839.1 | 205. | AF067845.4 | 280. | C1R        |
| 56. | AC139718.1 | 131. | CLUHP10    | 206. | GRB7       | 281. | AL139415.1 |
| 57. | AC008060.4 | 132. | AC104564.5 | 207. | FAM129A    | 282. | KCNK15     |
| 58. | SLC16A14   | 133. | DLGAP2-AS1 | 208. | ITPR3      | 283. | PPP2R2C    |
| 59. | CRHBP      | 134. | ST6GALNAC3 | 209. | AP003555.2 | 284. | AF067845.1 |
| 60. | PIK3IP1    | 135. | ALOX5      | 210. | AL161912.2 | 285. | TCN2       |
| 61. | DLGAP2     | 136. | NFASC      | 211. | AC017100.1 | 286. | LINC00670  |
| 62. | ARHGAP29   | 137. | BNIP3P39   | 212. | RN7SL88P   | 287. | NRN1       |
| 63. | FRG2C      | 138. | CCL17      | 213. | AC040970.1 | 288. | LINC00544  |
| 64. | FBXW7      | 139. | AC079209.1 | 214. | AC100803.3 | 289. | GRIK5      |
| 65. | AL356234.3 | 140. | AC080078.2 | 215. | LTA        | 290. | AC092614.1 |
| 66. | AC008060.1 | 141. | AL138881.1 | 216. | AC006305.3 | 291. | GPRIN3     |
| 67. | AC010542.1 | 142. | CD52       | 217. | SV2A       | 292. | AC004706.1 |
| 68. | AL359220.1 | 143. | AC011447.1 | 218. | LINC01841  | 293. | LINC02074  |
| 69. | AC087627.1 | 144. | LINC01471  | 219. | BNIP3P15   | 294. | AC100803.1 |
| 70. | CMTM2      | 145. | SEMA6A     | 220. | LGALS7     | 295. | GSDMA      |
| 71. | ZNF366     | 146. | LINC02577  | 221. | GAB1       | 296. | LINC02564  |
| 72. | AC005383.1 | 147. | UNC93B3    | 222. | AL669970.2 | 297. | CERNA1     |
| 73. | FGF16      | 148. | SEMA6A-AS1 | 223. | SLFN14     | 298. | AL512428.1 |
| 74. | C14orf132  | 149. | AC246785.3 | 224. | LYVE1      | 299. | AC084816.1 |
| 75. | AC018781.1 | 150. | AL731567.1 | 225. | CHST15     | 300. | NPR2       |
